# Supplementary material for: AutoTerm: an automated pipeline for glacier terminus extraction using machine learning and a “big data” repository of Greenland glacier termini
Source: Copernicus journal article supplement (doi:10.5194/tc-17-3485-2023), 2023-08-24
Supplement: Supplementary file 1 [file tc-17-3485-2023-supplement.pdf]

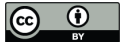

*Supplement of*

**AutoTerm: an automated pipeline for glacier terminus extraction using machine learning and a “big data” repository of Greenland glacier termini**

**Enze Zhang et al.**

*Correspondence to:* Enze Zhang (enze.zhang@austin.utexas.edu)

The copyright of individual parts of the supplement might differ from the article licence.

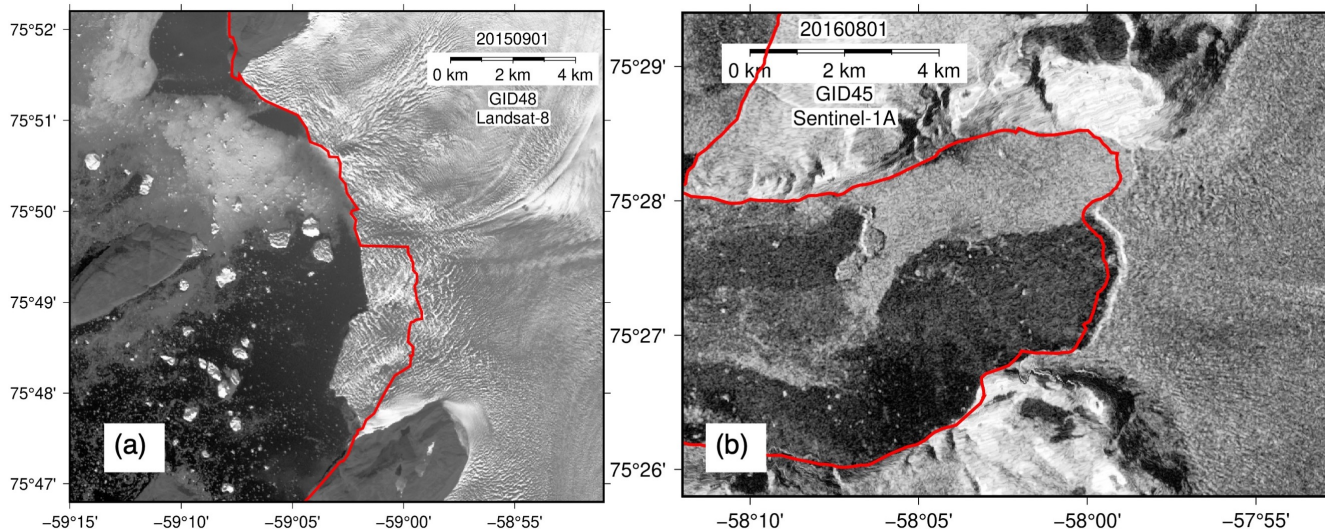

**Figure S1.** Examples of the TermPicks manually-delineated trace data (red) where traces are discarded because they are incorrect (a) or contain georeferencing offsets (b).

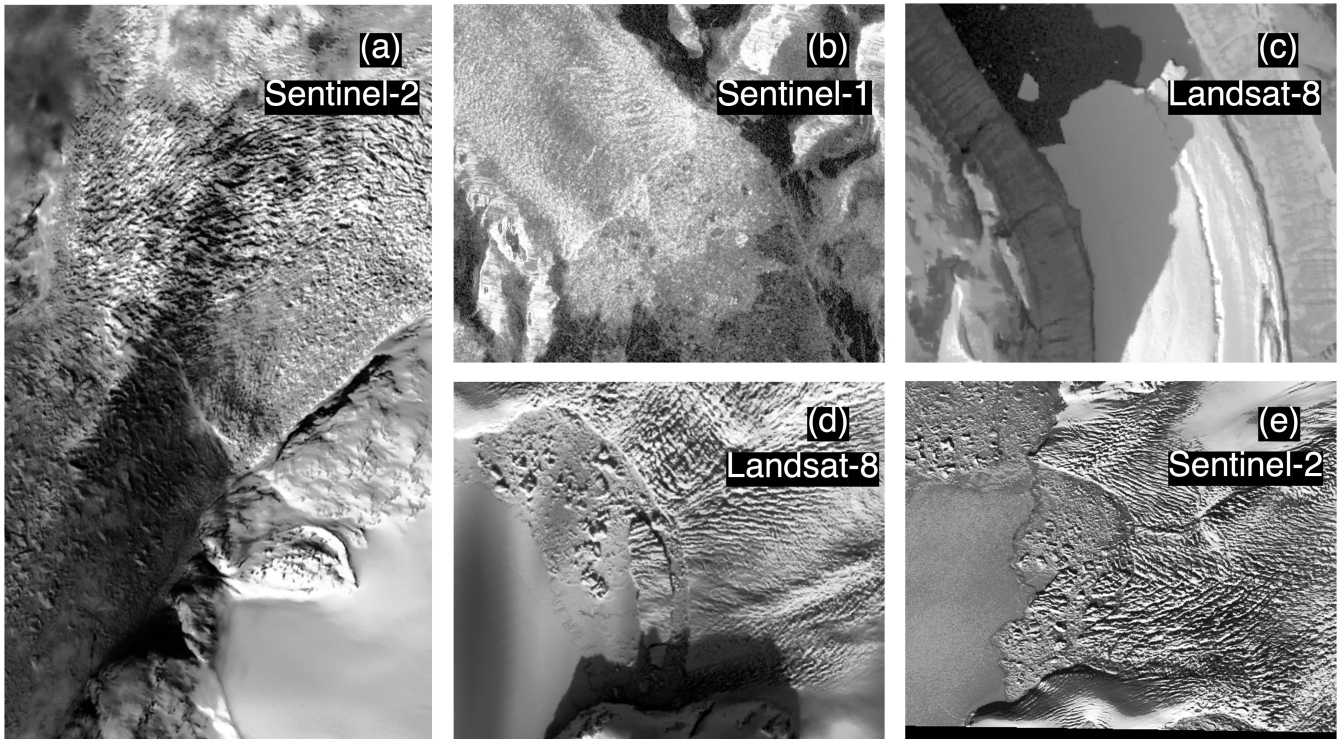

**Figure S2.** Examples of difficult conditions that need additional training data to increase the network's accuracy on these cases. (a) shows the cloudy image. (b) and (e) show the blur boundary caused by ice mélange for SAR and optical images, respectively. (c) and (d) show images with shadows.

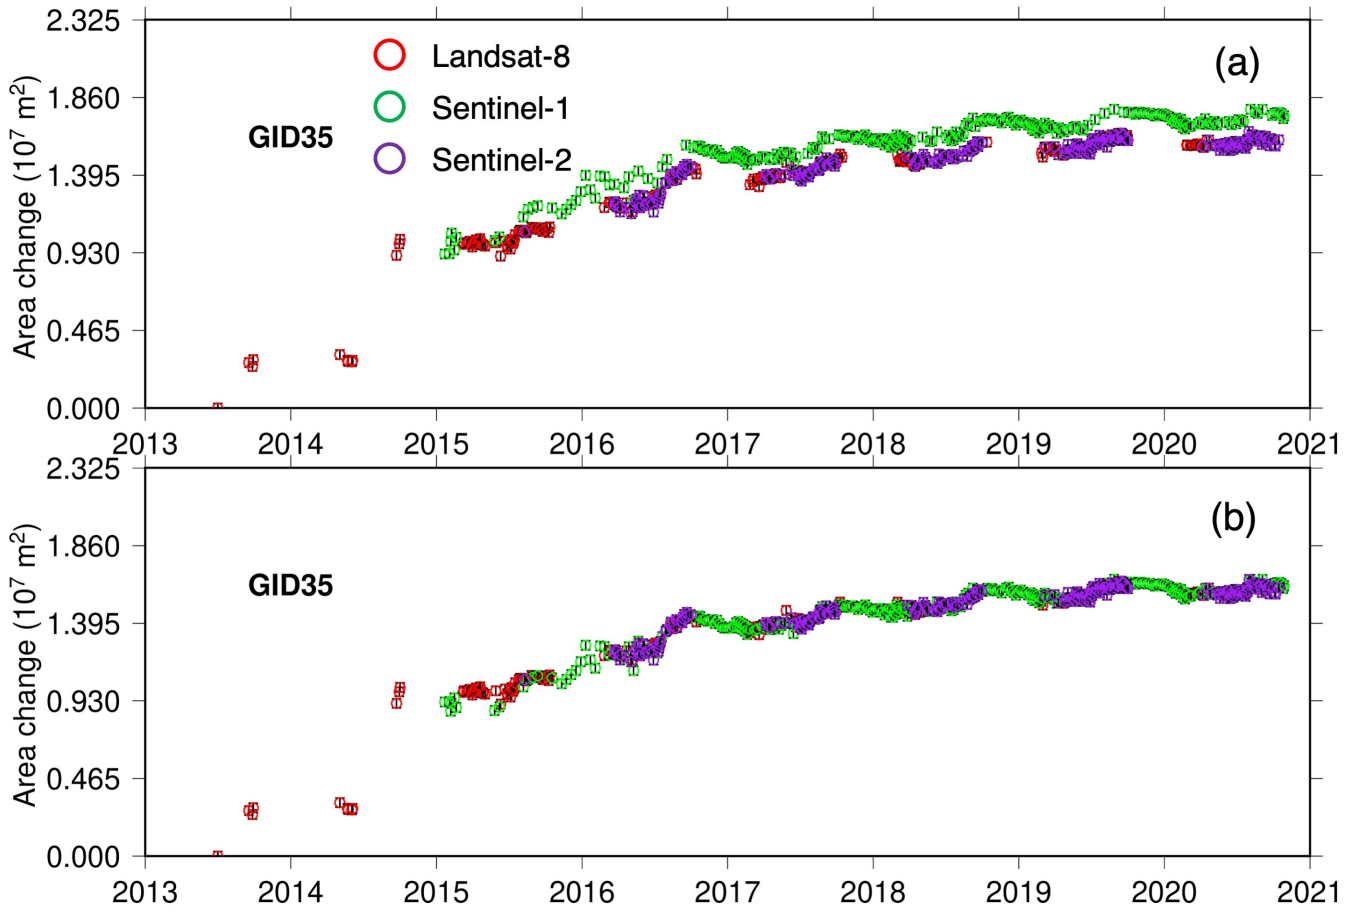

**Figure S3.** An example showing the results from AutoTerm before (a) and after (b) georeferencing adjustment for Sentinel-1 data.



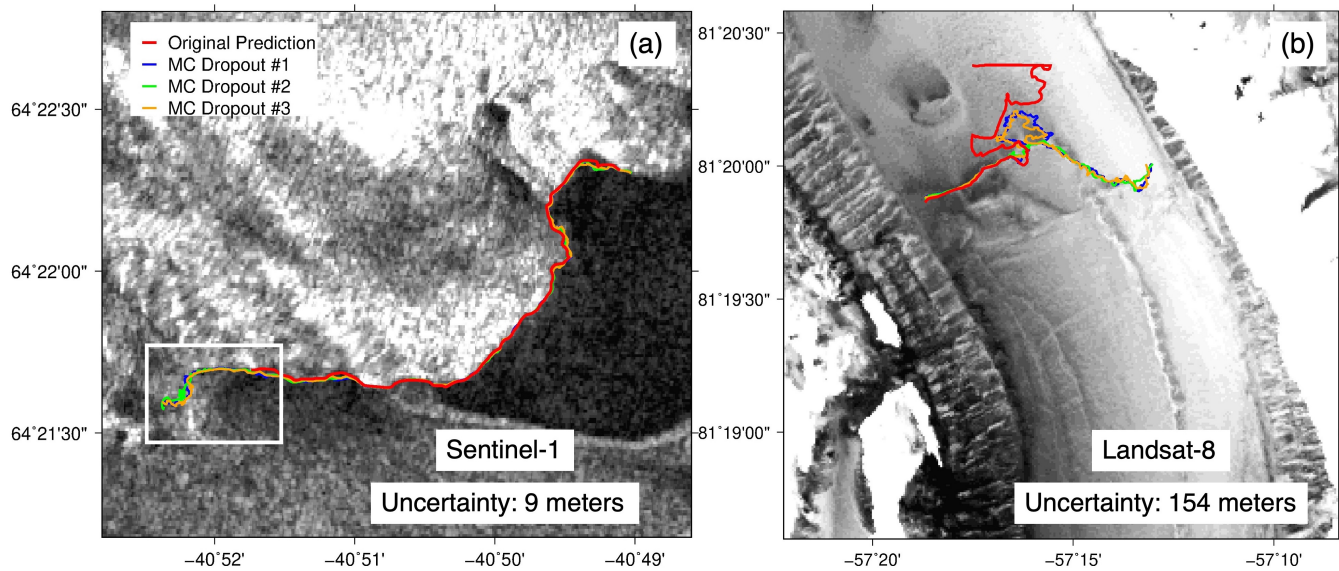

**Figure S4.** Examples showing the multiple terminus predictions from MC dropout and the comparison with the original prediction (red). (a) When the original prediction is of good quality, the results from MC dropout match, but contain noise. When the original prediction is of poor quality (b) the noise is amplified.

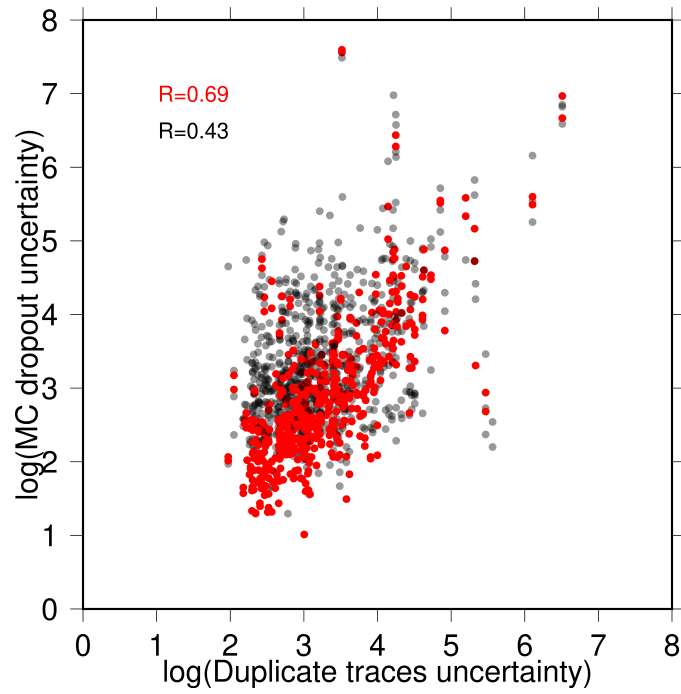

**Figure S5.** Comparison between duplicate trace uncertainty and MC dropout uncertainty. The linear relationship between these two measures of uncertain is more clear in Landsat-8 and Sentinel-2 since the duplicate traces are also based these two satellites (shown in red color). The linear relationship is less obvious among Landsat-5 & -7, and Sentinel-1 (black color) because the MC dropout uncertainty is influenced by each datasets characteristics.

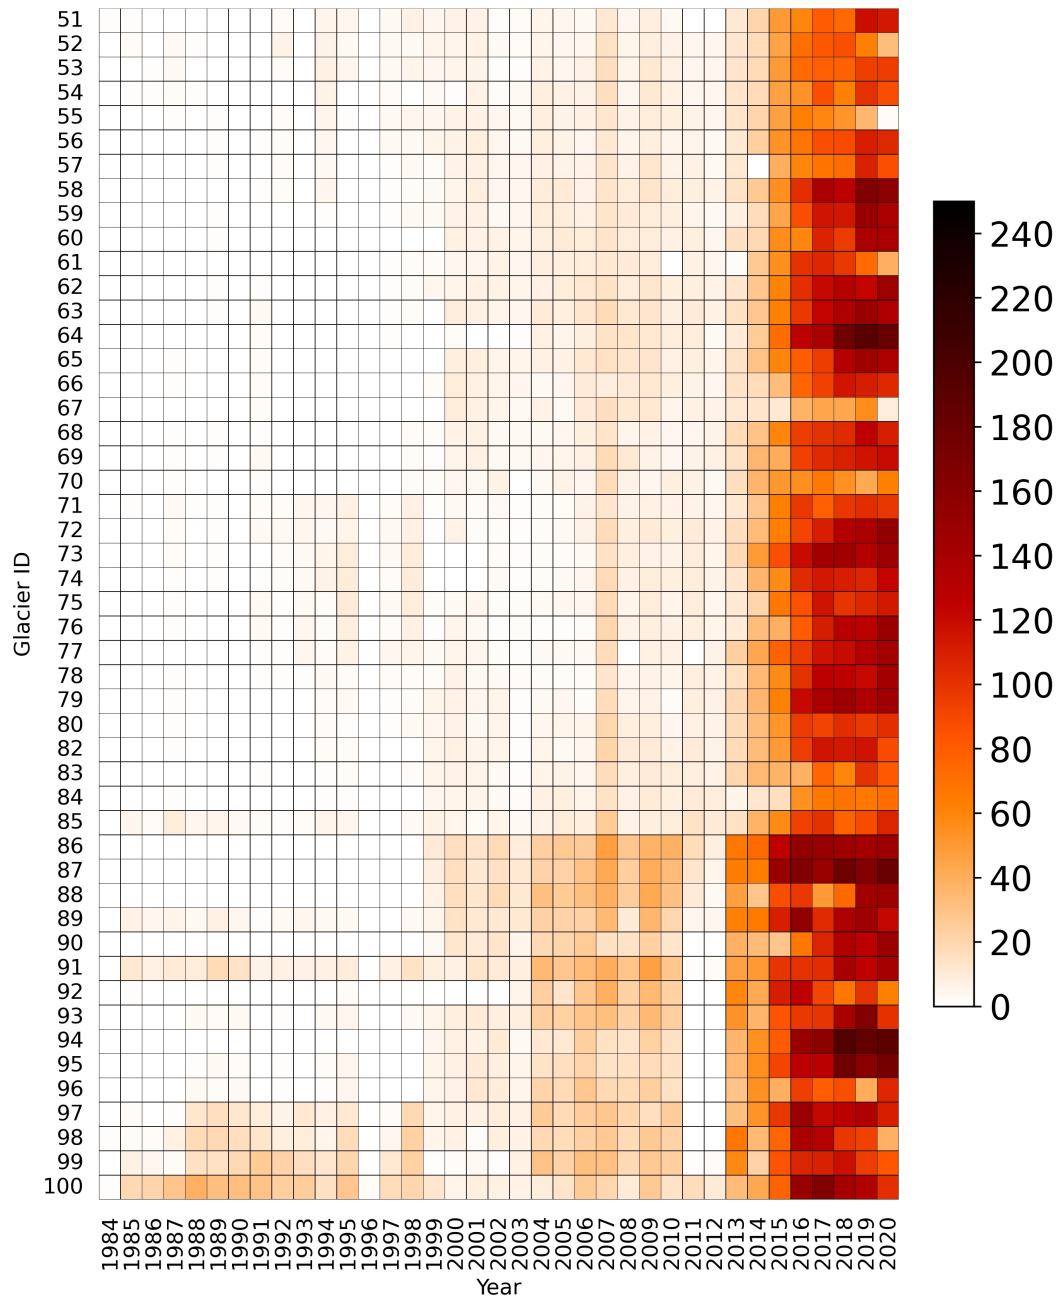

**Figure S6.** Heatmap of trace numbers in each year of glacier #51 to #100. Glacier #81 is not included since this glacier now converges with glacier #80. The terminus of glacier #81 will appear when the glacier retreat further in the future.

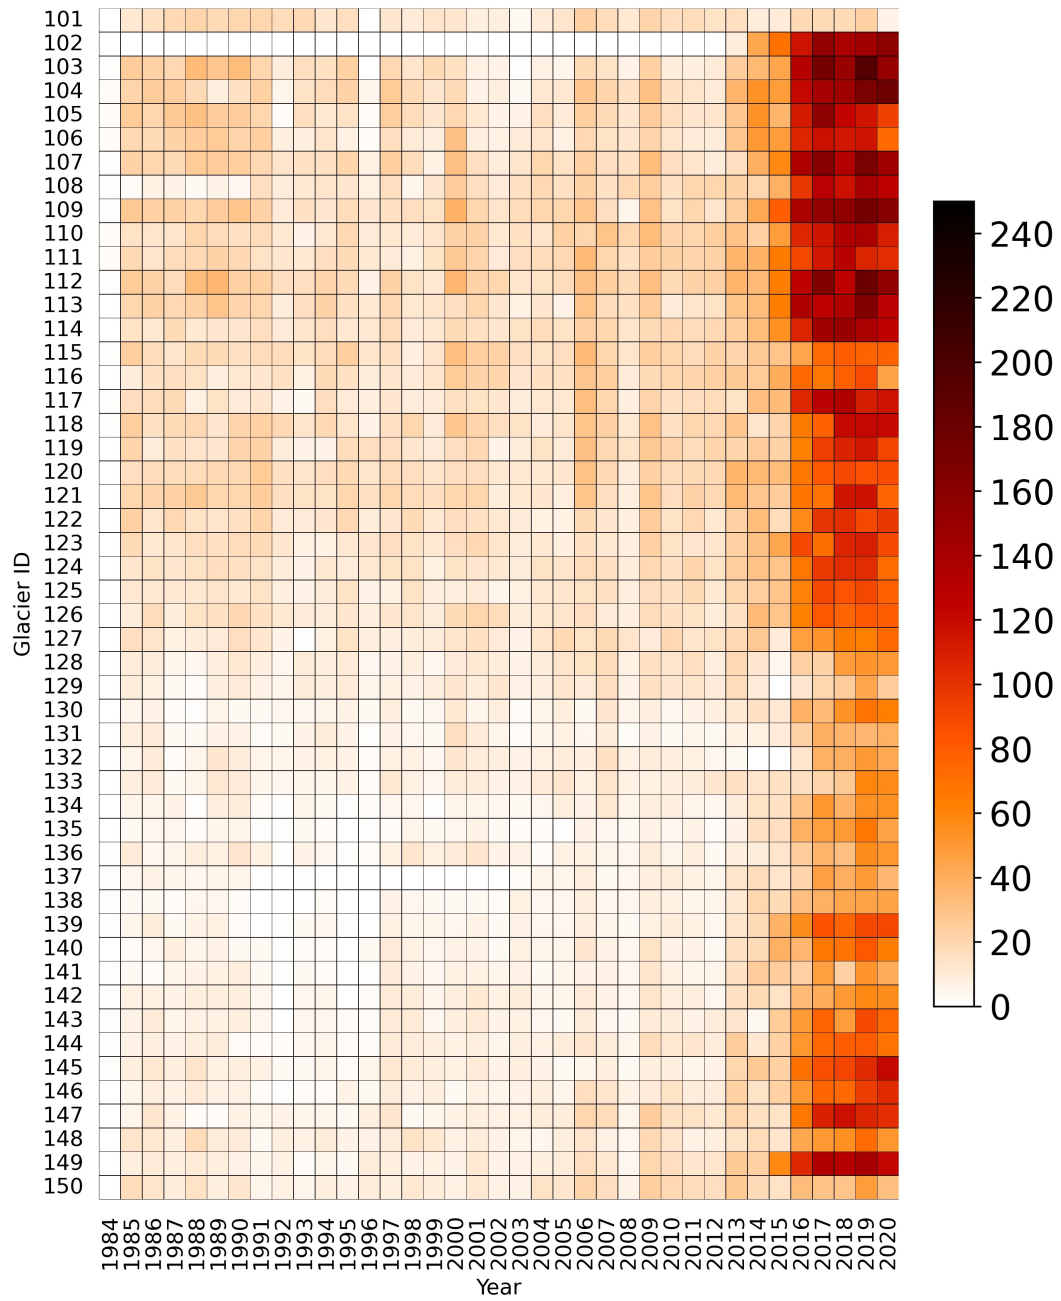

**Figure S7.** Heatmap of trace numbers in each year of glacier #101 to #150.





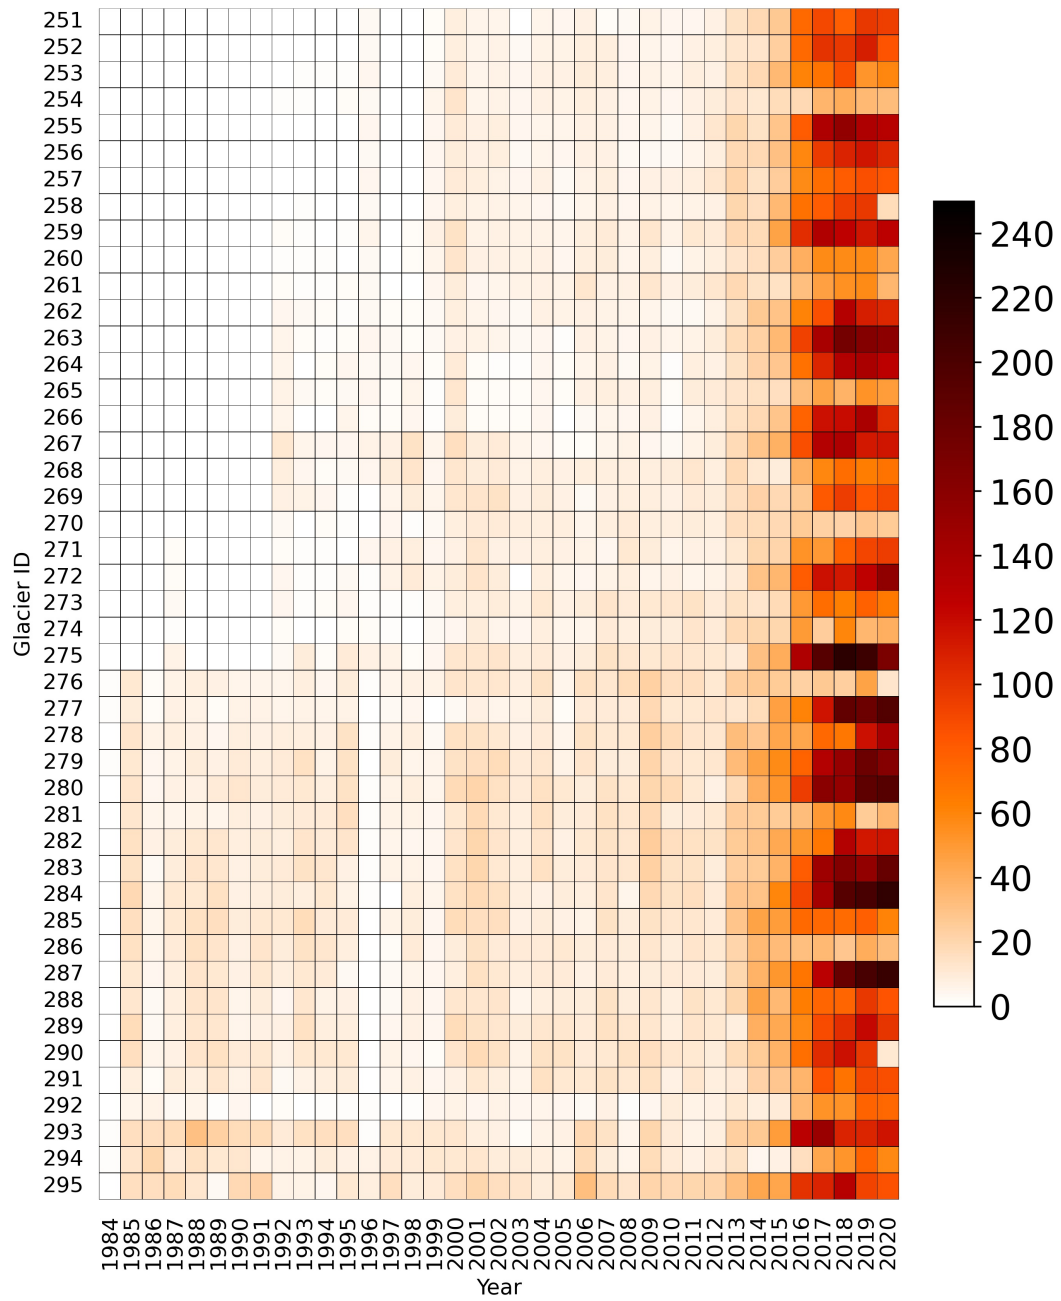

**Figure S10.** Heatmap of trace numbers in each year of glacier #251 to #295.



| Test Error with TermPicks | Test Error Without TermPicks | Date     | Source Satellite | Glacier ID |
|---------------------------|------------------------------|----------|------------------|------------|
| 53.791756                 | 83.306872                    | 19850326 | Landsat5         | GID24      |
| 63.790804                 | 331.75328                    | 19850608 | Landsat5         | GID282     |
| 76.354999                 | 447.60684                    | 19870813 | Landsat5         | GID166     |
| 28.957391                 | 57.70332                     | 19870923 | Landsat5         | GID113     |
| 45.63453                  | 606.9616                     | 19880909 | Landsat5         | GID3       |
| 32.092957                 | 431.465172                   | 19890324 | Landsat5         | GID276     |
| 146.701494                | 329.005611                   | 19890419 | Landsat5         | GID179     |
| 28.229173                 | 291.844793                   | 19890914 | Landsat5         | GID291     |
| 19.032543                 | 373.797559                   | 19900324 | Landsat5         | GID16      |
| 33.92077                  | 36.270591                    | 19900324 | Landsat5         | GID20      |
| 46.501115                 | 110.03379                    | 19900410 | Landsat5         | GID285     |
| 22.394615                 | 274.017867                   | 19900604 | Landsat5         | GID285     |
| 79.645225                 | 43.872977                    | 19900627 | Landsat5         | GID118     |
| 85.822644                 | 427.07849                    | 19920323 | Landsat5         | GID278     |
| 23.225398                 | 188.908521                   | 19920821 | Landsat5         | GID291     |
| 19.519905                 | 209.932714                   | 19930714 | Landsat5         | GID291     |
| 27.77369                  | 32.73293                     | 19930823 | Landsat5         | GID26      |
| 14.548154                 | 33.62423                     | 19960929 | Landsat5         | GID189     |
| 34.809287                 | 199.08978                    | 19990911 | Landsat7         | GID281     |
| 361.487932                | 119.433359                   | 20000917 | Landsat7         | GID273     |
| 17.354445                 | 41.520517                    | 20010325 | Landsat7         | GID15      |
| 40.407273                 | 229.51842                    | 20010601 | Landsat7         | GID117     |
| 74.799648                 | 3396.259283                  | 20010601 | Landsat7         | GID3       |
| 32.543116                 | 112.397499                   | 20010705 | Landsat7         | GID2       |
| 37.411317                 | 98.889582                    | 20010712 | Landsat7         | GID289     |
| 133.635362                | 102.931917                   | 20010805 | Landsat7         | GID21      |
| 35.494963                 | 64.553598                    | 20030517 | Landsat7         | GID276     |
| 230.241312                | 1687.034909                  | 20040630 | Landsat7         | GID108     |
| 36.961384                 | 322.579949                   | 20040921 | Landsat7         | GID24      |
| 17.970564                 | 30.920252                    | 20050621 | Landsat7         | GID289     |
| 666.204759                | 531.958242                   | 20050628 | Landsat7         | GID110     |
| 44.994872                 | 274.917371                   | 20060518 | Landsat7         | GID43      |
| 64.042958                 | 256.90852                    | 20060612 | Landsat5         | GID7       |
| 25.244107                 | 36.856921                    | 20060823 | Landsat7         | GID212     |
| 230.992875                | 461.218703                   | 20070308 | Landsat7         | GID18      |
| 308.561991                | 1218.199948                  | 20070826 | Landsat7         | GID231     |
| 315.783578                | 50.19733                     | 20070927 | Landsat7         | GID261     |
| 30.746381                 | 932.616649                   | 20080618 | Landsat7         | GID76      |
| 7.998567                  | 12.203809                    | 20080729 | Landsat7         | GID111     |
| 53.882179                 | 49.60613                     | 20080806 | Landsat7         | GID34      |
| 23.537871                 | 241.962044                   | 20080812 | Landsat7         | GID252     |
| 25.294883                 | 16.342035                    | 20080812 | Landsat7         | GID258     |
| 1518.746388               | 2141.635959                  | 20090727 | Landsat7         | GID101     |
| 27.862551                 | 75.443717                    | 20100409 | Landsat7         | GID283     |
| 33.096822                 | 38.446443                    | 20100427 | Landsat7         | GID281     |
| 28.561764                 | 63.349167                    | 20100707 | Landsat7         | GID46      |

Continued on next page

Table S1 – continued from previous page

| Test Error with TermPicks | Test Error Without TermPicks | Date     | Source Satellite | Glacier ID |
|---------------------------|------------------------------|----------|------------------|------------|
| 52.692044                 | 1295.470344                  | 20110620 | Landsat7         | GID3       |
| 17.960138                 | 2448.689631                  | 20110622 | Landsat7         | GID147     |
| 25.921291                 | 384.745369                   | 20110703 | Landsat7         | GID285     |
| 59.676144                 | 149.258813                   | 20130525 | Landsat8         | GID3       |
| 41.145579                 | 111.696945                   | 20130724 | Landsat7         | GID283     |
| 7.435473                  | 9.719872                     | 20130818 | Landsat8         | GID246     |
| 58.873886                 | 67.912154                    | 20130820 | Landsat8         | GID4       |
| 14.391626                 | 65.097258                    | 20130928 | Landsat8         | GID248     |
| 16.211853                 | 119.16742                    | 20140403 | Landsat8         | GID285     |
| 22.791241                 | 57.800659                    | 20140412 | Landsat8         | GID280     |
| 22.029099                 | 81.6343                      | 20140615 | Landsat8         | GID283     |
| 18.315224                 | 1164.187645                  | 20140701 | Landsat8         | GID285     |
| 9.473646                  | 39.490245                    | 20140906 | Landsat8         | GID259     |
| 57.85372                  | 363.137859                   | 20141014 | Landsat8         | GID282     |
| 143.931805                | 109.007465                   | 20150216 | Sentinel1        | GID89      |
| 20.663224                 | 64.948145                    | 20150602 | Landsat8         | GID280     |
| 31.13315                  | 213.255199                   | 20150607 | Landsat8         | GID149     |
| 11.397612                 | 317.28548                    | 20150630 | Landsat8         | GID3       |
| 46.477214                 | 58.918269                    | 20150801 | Landsat8         | GID248     |
| 11.757996                 | 112.494727                   | 20150824 | Landsat8         | GID229     |
| 19.68002                  | 16.625673                    | 20150910 | Landsat8         | GID39      |
| 13.765711                 | 1256.607165                  | 20150918 | Landsat8         | GID8       |
| 44.966972                 | 706.004019                   | 20160203 | Sentinel1        | GID16      |
| 26.41241                  | 125.170031                   | 20160505 | Sentinel2        | GID276     |
| 55.731347                 | 138.613512                   | 20160507 | Landsat8         | GID31      |
| 40.757093                 | 184.029524                   | 20160625 | Landsat8         | GID31      |
| 38.079035                 | 171.850987                   | 20160725 | Landsat8         | GID196     |
| 43.477988                 | 61.771139                    | 20160803 | Landsat8         | GID198     |
| 43.918156                 | 39.218394                    | 20160803 | Landsat8         | GID223     |
| 8.430694                  | 11.903316                    | 20160809 | Landsat8         | GID71      |
| 18.617119                 | 466.467478                   | 20160913 | Landsat8         | GID3       |
| 12.263013                 | 25.518464                    | 20160923 | Sentinel2        | GID31      |
| 17.476996                 | 12.355781                    | 20160924 | Sentinel2        | GID245     |
| 66.978166                 | 59.390092                    | 20161012 | Landsat8         | GID39      |
| 28.501164                 | 195.699671                   | 20170203 | Sentinel1        | GID277     |
| 31.598322                 | 23.535178                    | 20170205 | Sentinel1        | GID228     |
| 67.342792                 | 32.853496                    | 20170328 | Landsat8         | GID288     |
| 93.019042                 | 149.070066                   | 20170706 | Landsat8         | GID35      |
| 19.407281                 | 63.686783                    | 20170722 | Sentinel2        | GID26      |
| 18.475434                 | 89.474552                    | 20170806 | Landsat8         | GID118     |
| 27.754982                 | 31.004995                    | 20170812 | Sentinel2        | GID280     |
| 4.817764                  | 11.460152                    | 20170824 | Landsat8         | GID109     |
| 10.987696                 | 111.950286                   | 20170918 | Landsat8         | GID286     |
| 17.695374                 | 22.328893                    | 20170923 | Landsat8         | GID245     |
| 19.928759                 | 38.029647                    | 20170923 | Landsat8         | GID2       |
| 14.127737                 | 20.143703                    | 20170923 | Sentinel2        | GID111     |

Continued on next page

**Table S1 – continued from previous page**

| <b>Test Error with TermPicks</b> | <b>Test Error Without TermPicks</b> | <b>Date</b> | <b>Source Satellite</b> | <b>Glacier ID</b> |
|----------------------------------|-------------------------------------|-------------|-------------------------|-------------------|
| 26.165231                        | 244.641145                          | 20180611    | Landsat8                | GID280            |
| 50.972747                        | 80.605859                           | 20180615    | Sentinel2               | GID3              |
| 7.76875                          | 635.162671                          | 20180807    | Landsat8                | GID261            |
| 23.055051                        | 1166.327885                         | 20180918    | Sentinel2               | GID2              |
| 46.707645                        | 64.483446                           | 20180919    | Landsat8                | GID179            |
| 944.73624                        | 594.603114                          | 20190307    | Sentinel1               | GID145            |
| 15.617539                        | 364.746743                          | 20190316    | Landsat8                | GID286            |
| 16.968971                        | 12.175288                           | 20190318    | Landsat8                | GID58             |

Table S1: The test errors of the networks trained with and without TermPicks. All values are in meters. The last three columns refer to the information of the 100 remote sensing images in the test set.

|                         | <b>Landsat-5</b> | <b>Landsat-7</b> | <b>Landsat-8</b> | <b>Sentinel-1</b> | <b>Sentinel-2</b> |
|-------------------------|------------------|------------------|------------------|-------------------|-------------------|
| Before screening module | 48               | 146              | 30               | 238               | 24                |
| After screening module  | 48               | 121              | 30               | 72                | 24                |

Table S2. The mean test errors of the network trained with TermPicks among five sensors. The first row is the test error before screening, and the second row is test error after screening.

| <b>Glacier ID</b> | <b>Test Error without normalization</b> | <b>Test Error with normalization</b> | <b>Uncertainty without normalization</b> | <b>Uncertainty with normalization</b> |
|-------------------|-----------------------------------------|--------------------------------------|------------------------------------------|---------------------------------------|
| GID53             | 106                                     | 39                                   | 63                                       | 45                                    |
| GID54             | 103                                     | 55                                   | 97                                       | 30                                    |
| GID55             | 160                                     | 27                                   | 105                                      | 34                                    |
| GID59             | 46                                      | 38                                   | 82                                       | 34                                    |
| GID62             | 526                                     | 17                                   | 139                                      | 39                                    |

Table S3. The test errors and uncertainties of duplicate traces with and without image size normalization. All values are in meters.
